# Supplementary material for: Information Acquisition, Noise Trading, and Speculation in Double Auction Markets*
Source: Royal Society of Chemistry journal article supplement (doi:10.1039/d3sm01726e), 2008-01-01
Supplement: d3sm01726e1.pdf [file d3sm01726e1.pdf]

## pH-Controlled Breakup of Fractal Aggregates, Microgels and Gels formed by Self-Assembled Amphiphilic Triblock Copolymers

Gireeshkumar Balakrishnan Nair, Marli Miriam De Souza Lima, Frederick Niepceron, Olivier Colombani, Taco Nicolai\* and Christophe Chassenieux\*

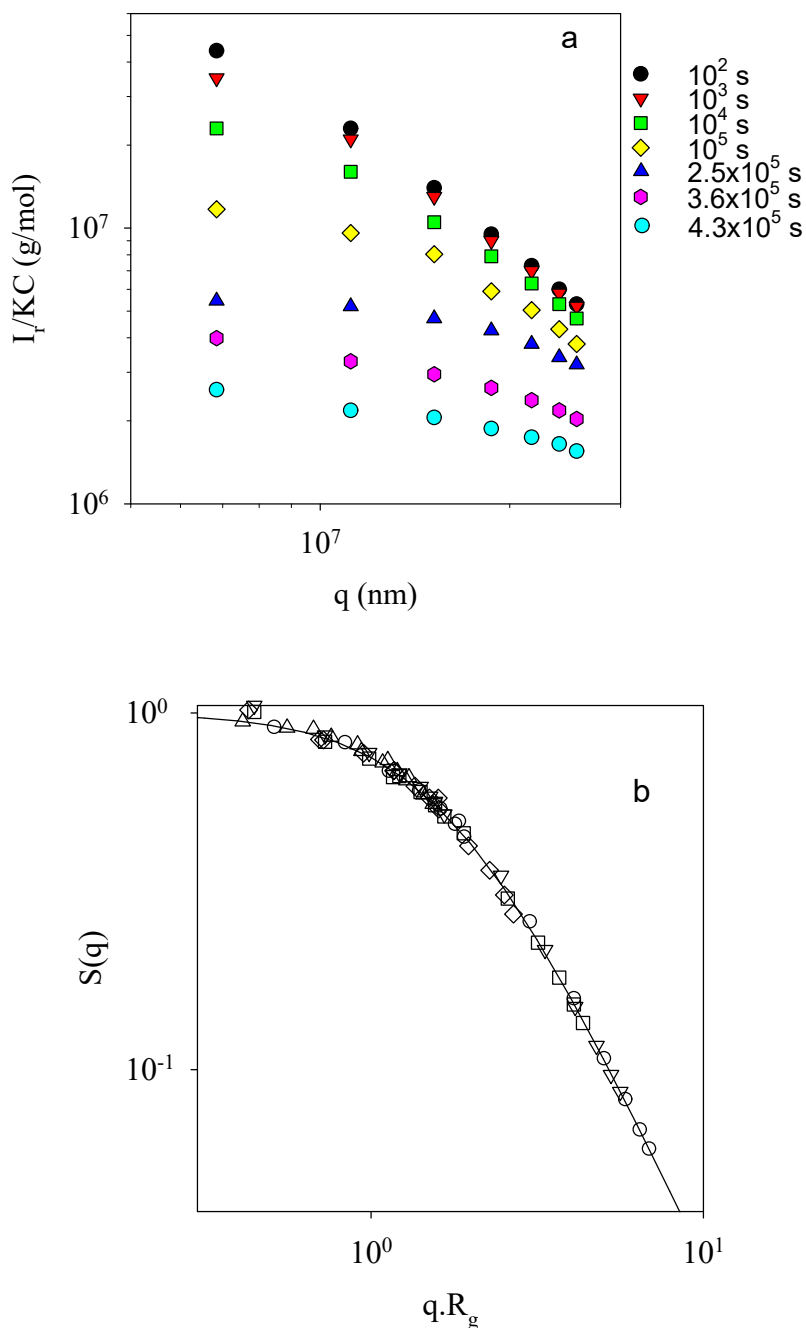

Fig. S1a q-dependence of  $I_r/KC$  for aggregates formed during breakup at different times indicated in the figure after setting the pH at 4.8. For clarity not all results are shown.

Fig. S1b Structure factor of the aggregates formed at different times as a function of  $q \cdot R_g$ . The solid line represents eq. 3.

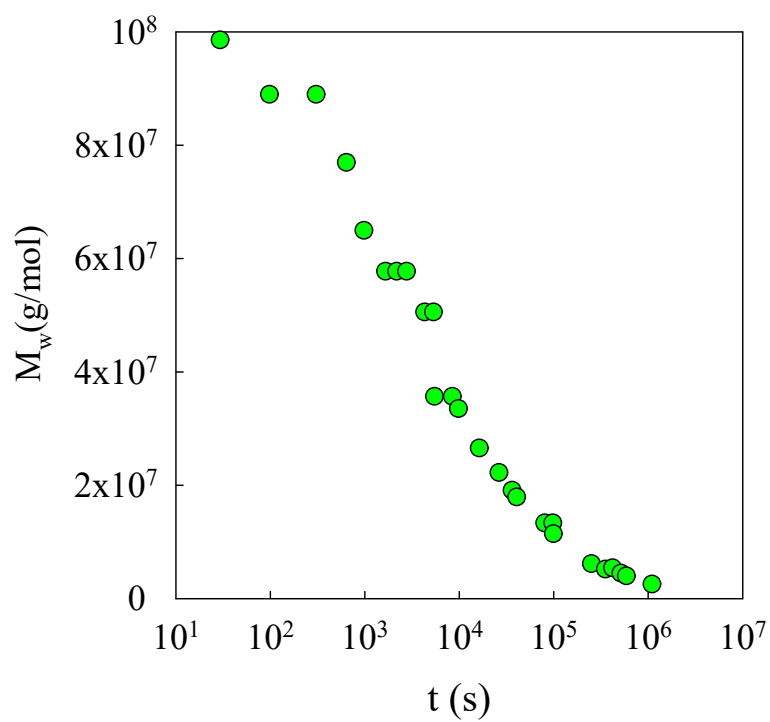

Fig. S2 Weight average molar mass of aggregates as a function of time after setting the pH at 4.8.
